# Supplementary material
Source: MDPI journal article supplement (https://www.mdpi.com/search?q=molecules-23-02067)

## Supplementary Materials

Article

**Synthesis, spectroscopic analysis and assessment of the biological activity of new hydrazine and hydrazide derivatives of 3-formylchromone**

**Krzysztof Słomiak <sup>1,\*</sup>, Andrzej Łazarenkow <sup>1</sup>, Lilianna Chęcińska <sup>2</sup>, Joachim Kusz <sup>3</sup>, Justyn Ochocki <sup>1</sup> and Jolanta Nawrot-Modranka <sup>1</sup>**

<sup>1</sup> Department of Bioinorganic Chemistry, Medical University of Lodz, Muszyńskiego 1, 90-151 Łódź, Poland; andrzej.lazarenkow@umed.lodz.pl (A.Ł.); justyn.ochocki@umed.lodz.pl (J.O.); jolanta.nawrot-modranka@umed.lodz.pl (J.N-M.)

<sup>2</sup> Department of Physical Chemistry, Faculty of Chemistry, University of Lodz, Pomorska 163/165, 90-236 Łódź, Poland; lilianna.checinska@chemia.uni.lodz.pl

<sup>3</sup> Department of Physics of Crystals, Institute of Physics, University of Silesia, Uniwersytecka 4, 40-007 Katowice, Poland; joachim.kusz@us.edu.pl

\* Correspondence: krzysztof.slomiak@umed.lodz.pl; Tel.: +48-42-677-92-20

Received: date; Accepted: date; Published: date

### Table of contents

|                                                                                                                             |      |
|-----------------------------------------------------------------------------------------------------------------------------|------|
| <b>Table S1.</b> Selected geometric parameters for <b>1, 3, 5, 8</b> and <b>10</b> .                                        | page |
| 2                                                                                                                           |      |
| <b>Table S2:</b> Aromatic $\pi \cdots \pi$ interactions ( $\text{\AA}, ^\circ$ ) for structures <b>1, 5, 8, 10</b> .        | page |
| 3                                                                                                                           |      |
| <b>Figure S3:</b> Cell proliferation study concentration-response curves for tested compounds on cell lines: L929 EA.hy926. | page |
| 4                                                                                                                           |      |
| <b>Figure S4:</b> $^1\text{H}$ NMR and $^{13}\text{C}$ NMR Spectra                                                          | page |
| 12                                                                                                                          |      |

**Table S1.** Selected geometric parameters (Å,°) for **1**, **3**, **5**, **8** and **10**.

|                | <b>1</b>    | <b>1</b>    | <b>3</b>  | <b>5</b>  | <b>5</b>  | <b>8</b>   | <b>10</b>               |
|----------------|-------------|-------------|-----------|-----------|-----------|------------|-------------------------|
| O1–C2          | 1.3476(16)  | 1.3477(17)  | 1.348(3)  | 1.341(3)  | 1.340(2)  | 1.3473(11) | 1.313(2) <sup>#</sup>   |
| O1–C9          | 1.3736(16)  | 1.3766(17)  | 1.359(3)  | 1.370(3)  | 1.374(3)  | 1.3738(10) | 1.373(2)                |
| O2–C4          | 1.2360(16)  | 1.2362(16)  | 1.234(3)  | 1.226(2)  | 1.229(2)  | 1.2364(10) | 1.234(2)                |
| C2–C3          | 1.3498(19)  | 1.3502(19)  | 1.336(3)  | 1.336(3)  | 1.333(3)  | 1.3550(12) | 1.347(3) <sup>#</sup>   |
| C3–C4          | 1.4544(18)  | 1.4594(19)  | 1.445(3)  | 1.449(3)  | 1.445(3)  | 1.4611(11) | 1.433(3) <sup>#</sup>   |
| C4–C10         | 1.4622(18)  | 1.4701(19)  | 1.454(3)  | 1.462(3)  | 1.458(3)  | 1.4651(12) | 1.458(2)                |
| C9–C10         | 1.3891(19)  | 1.3870(19)  | 1.380(3)  | 1.381(3)  | 1.377(3)  | 1.3944(11) | 1.394(2)                |
| C3–C11         | 1.4622(18)  | 1.4644(19)  | 1.444(3)  | 1.453(3)  | 1.451(3)  | 1.4628(12) | 1.480(3) <sup>#</sup>   |
| N1–N2          | 1.3608(16)  | 1.3677(16)  | 1.350(3)  | 1.369(2)  | 1.383(2)  | 1.3711(10) | 1.364(2)                |
| N1–C11         | 1.2831(18)  | 1.2811(18)  | 1.278(3)  | 1.268(3)  | 1.266(3)  | 1.2861(11) | 1.279(2)                |
| N2–C12*        | 1.3755(18)  | 1.3788(18)  | 1.372(3)  | 1.349(3)  | 1.339(3)  | 1.3905(11) | 1.386(2)                |
| O3–C12         | –           | –           | –         | 1.223(2)  | 1.235(2)  | –          | –                       |
| C12–C13        | –           | –           | –         | 1.472(3)  | 1.479(3)  | –          | –                       |
| C2–O1–C9       | 118.26(11)  | 118.38(11)  | 118.4(2)  | 118.3(2)  | 118.2(2)  | 118.45(7)  | 117.05(14) <sup>#</sup> |
| O1–C2–C3       | 125.24(13)  | 125.03(13)  | 125.4(2)  | 125.5(2)  | 125.3(2)  | 125.16(8)  | 126.62(9) <sup>#</sup>  |
| C2–C3–C4       | 119.83(12)  | 119.85(13)  | 119.0(2)  | 119.7(2)  | 119.8(2)  | 119.45(8)  | 120.11(18) <sup>#</sup> |
| O2–C4–C3       | 123.04(12)  | 122.83(13)  | 121.9(2)  | 122.5(2)  | 122.4(2)  | 122.50(8)  | 122.77(17) <sup>#</sup> |
| C3–C4–C10      | 114.56(12)  | 114.67(12)  | 115.4(2)  | 114.6(2)  | 115.0(2)  | 114.99(7)  | 113.80(15) <sup>#</sup> |
| C2–C3–C11      | 121.07(12)  | 121.23(13)  | 121.1(2)  | 121.3(2)  | 121.8(2)  | 121.82(8)  | 120.60(18)              |
| C3–C11–N1      | 119.49(13)  | 120.31(13)  | 120.9(2)  | 119.5(2)  | 121.6(2)  | 120.30(8)  | 121.20(15)              |
| C11–N1–N2      | 116.58(12)  | 116.49(12)  | 117.4(2)  | 117.4(2)  | 114.6(2)  | 115.77(7)  | 116.56(14)              |
| N1–N2–C12      | 118.37(12)  | 118.07(12)  | 120.3(2)  | 118.4(2)  | 119.5(2)  | 118.60(7)  | 117.71(14)              |
| N2–C12–O3      | –           | –           | –         | 121.9(2)  | 122.4(2)  | –          | –                       |
| C13–C12–O3     | –           | –           | –         | 121.4(2)  | 121.8(2)  | –          | –                       |
| C2–C3–C11–N1   | -0.2(2)     | 7.4(2)      | 4.7(4)    | -19.6(3)  | -25.4(3)  | -3.86(13)  | -11.0(3) <sup>#</sup>   |
| C11–N1–N2–C12  | -177.85(13) | 172.82(13)  | -178.5(2) | -177.0(2) | 176.6(2)  | -165.72(8) | -171.53(16)             |
| N1–N2–C12–C13  | 164.16(13)  | 173.59(12)  | -179.6(2) | -174.5(2) | -178.4(2) | -160.69(8) | -167.04(15)             |
| O2–C4–C3–C11   | 0.5(2)      | -0.1(2)     | -0.1(4)   | -3.3(3)   | -2.5(3)   | 1.84(13)   | 179.35(17) <sup>#</sup> |
| N2–C12–C13–C14 | -179.49(14) | -179.65(13) | -179.5(3) | 25.4(3)   | 21.3(3)   | 179.77(8)  | 179.02(16)              |

\* - for **5**, the N2–C12 bond differs in its type in comparison to the remaining structures;

<sup>#</sup> - for **10**, the geometric parameters involving the disordered C2 and C3 atoms are presented only for major component A.

**Table S2:** Aromatic  $\pi\cdots\pi$  interactions ( $\text{\AA},^\circ$ ) for structures **1**, **5**, **8**, **10**.

| Compound  | Interaction               | $Cg(I)\cdots Cg(J)$ | $\alpha$ | $Cg(I)_{\text{perp}}$ | $Cg(J)_{\text{perp}}$ | Slippage |
|-----------|---------------------------|---------------------|----------|-----------------------|-----------------------|----------|
| <b>1</b>  | $Cg(1)\cdots Cg(1)^i$     | 3.530(1)            | 0.0(1)   | -3.281(1)             | -3.381(1)             | 1.302    |
|           | $Cg(1)\cdots Cg(2)^i$     | 3.520(1)            | 2.3(1)   | -3.269(1)             | -3.314(1)             | 1.188    |
|           | $Cg(3)\cdots Cg(3)^{ii}$  | 3.805(1)            | 0.0(1)   | -3.483(1)             | -3.483(1)             | 1.531    |
|           | $Cg(5)\cdots Cg(7)^{iii}$ | 3.498(1)            | 5.5(1)   | -3.422(1)             | 3.368(1)              | 0.947    |
|           | $Cg(6)\cdots Cg(7)^{iv}$  | 3.627(1)            | 3.8(1)   | -3.327(1)             | -3.402(1)             | 1.256    |
| <b>5</b>  | $Cg(7)\cdots Cg(5)^i$     | 3.726(1)            | 8.0(1)   | -3.326(1)             | -3.445(1)             | 1.419    |
| <b>8</b>  | $Cg(2)\cdots Cg(1)^i$     | 3.493(1)            | 1.1(1)   | 3.346(1)              | -3.365(1)             | 0.937    |
|           | $Cg(3)\cdots Cg(3)^i$     | 3.921(1)            | 0.0(1)   | 3.552(1)              | -3.552(1)             | 1.662    |
| <b>10</b> | $Cg(1)\cdots Cg(1)^i$     | 3.415(1)            | 0.0(1)   | 3.409(1)              | 3.409(1)              | 0.187    |
|           | $Cg(2)\cdots Cg(3)^{ii}$  | 3.889(1)            | 3.3(1)   | -3.523(1)             | -3.533(1)             | 1.625    |

$Cg\cdots Cg$  – distance between ring centroids;  $\alpha$  – dihedral angle between planes I and J;  $Cg(I)_{\text{perp}}$  and  $Cg(J)_{\text{perp}}$  – (interplanar spacing) perpendicular distance of  $Cg(I)$  on ring J and  $Cg(J)$  on ring I, respectively; slippage – distance between  $Cg(I)$  and perpendicular projection of  $Cg(J)$  on ring I.

$Cg(1)$  (in molecule 1) and  $Cg(5)$  (in molecule 2) – a centre-of-gravity of heterocyclic ring;  $Cg(2)$  (in molecule 1) and  $Cg(6)$  (in molecule 2) – a centre-of-gravity of benzene ring (condensed with a heterocyclic one);  $Cg(3)$  (in molecule 1) and  $Cg(7)$  (in molecule 2) – a centre-of-gravity of phenyl ring.

Symmetry codes: **1** (i)  $-x,1-y,1-z$ ; (ii)  $-x,1-y,-z$ ; (iii)  $1-x,2-y,1-z$ ; (iv)  $-x,2-y,1-z$ ; **5** (i)  $1-x,-y,1-z$ ; **8** (i)  $-1+x,y,z$ ; **10** (i)  $1-x,2-y,1-z$ ; (ii)  $1-x,1-y,1-z$ .

**Figure S3:** Cell proliferation study concentration-response curves for tested compounds on cell lines:  
L929 EA.hy926.

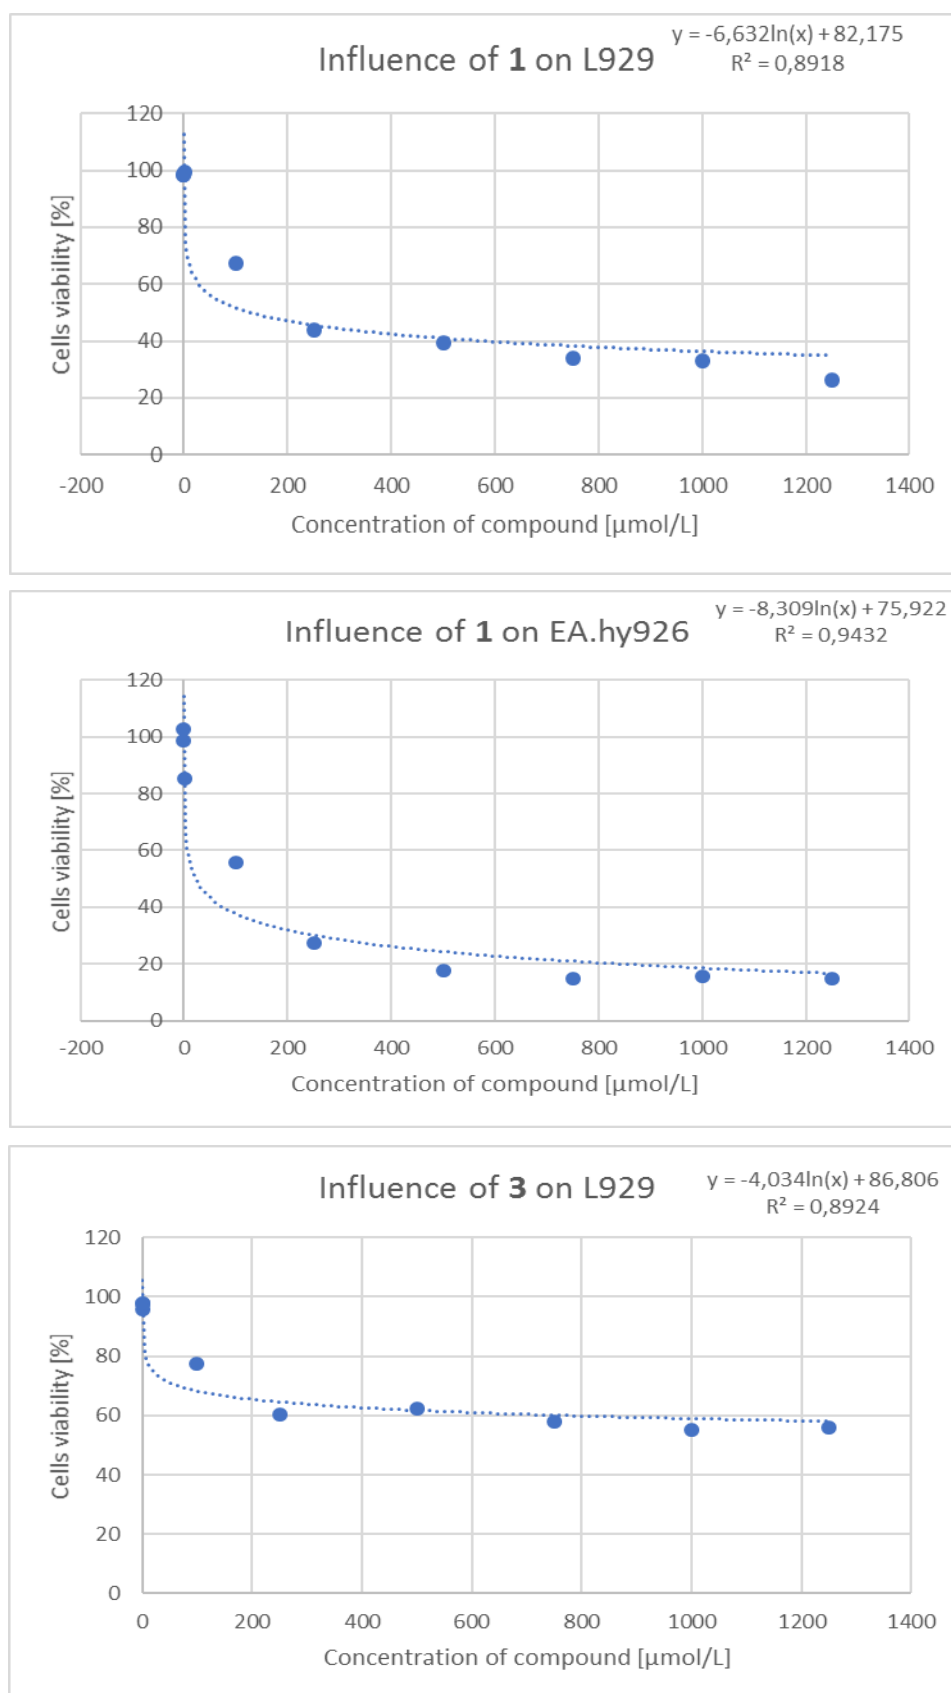

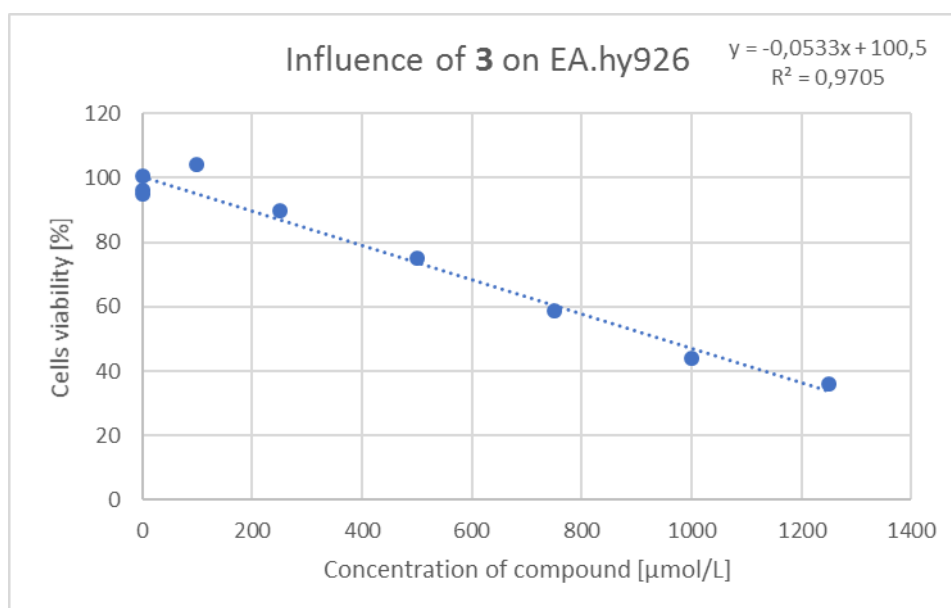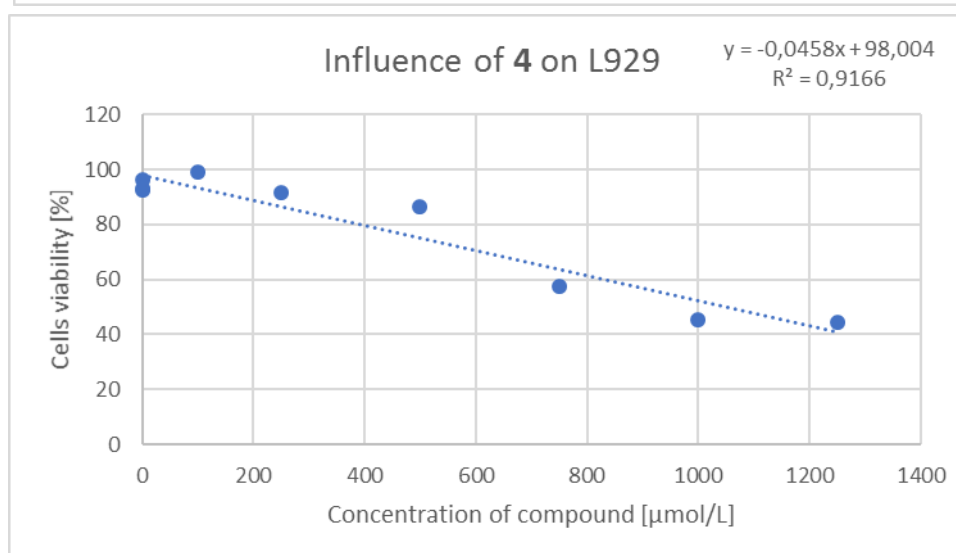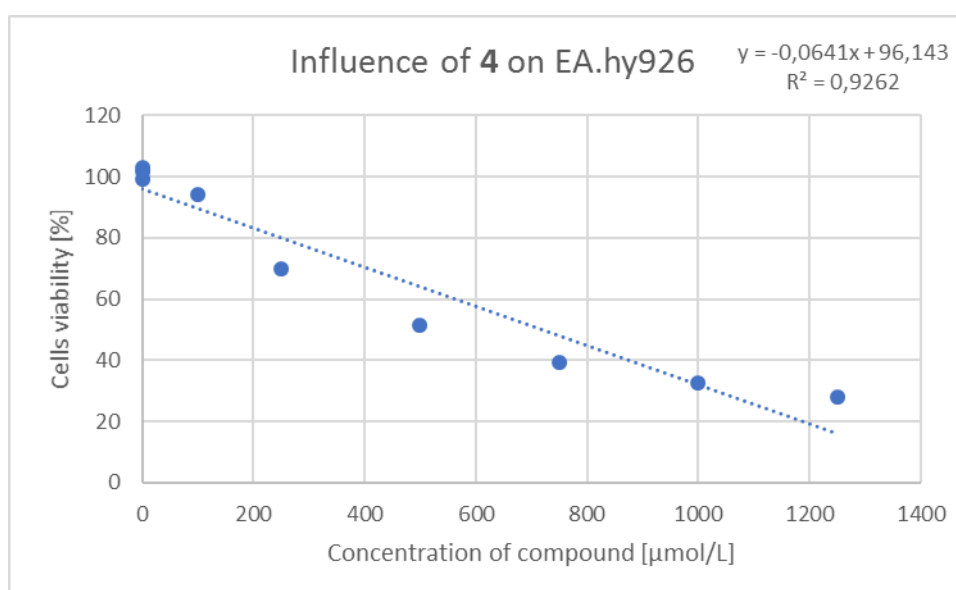

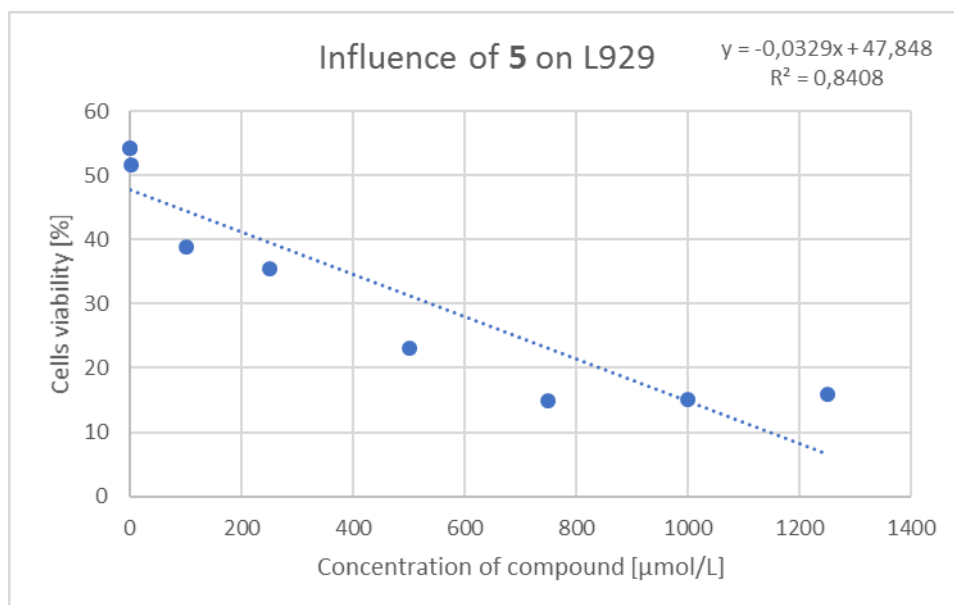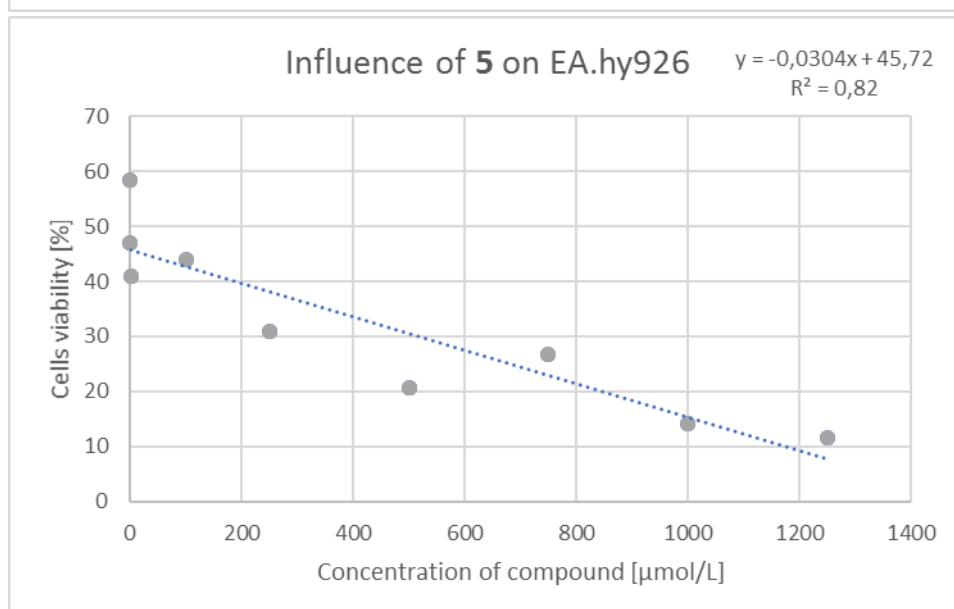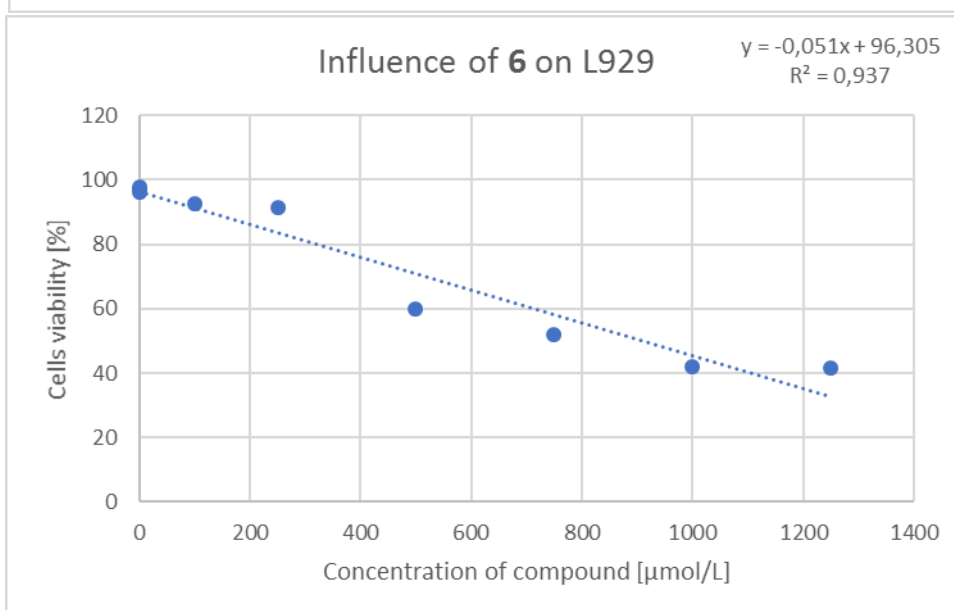

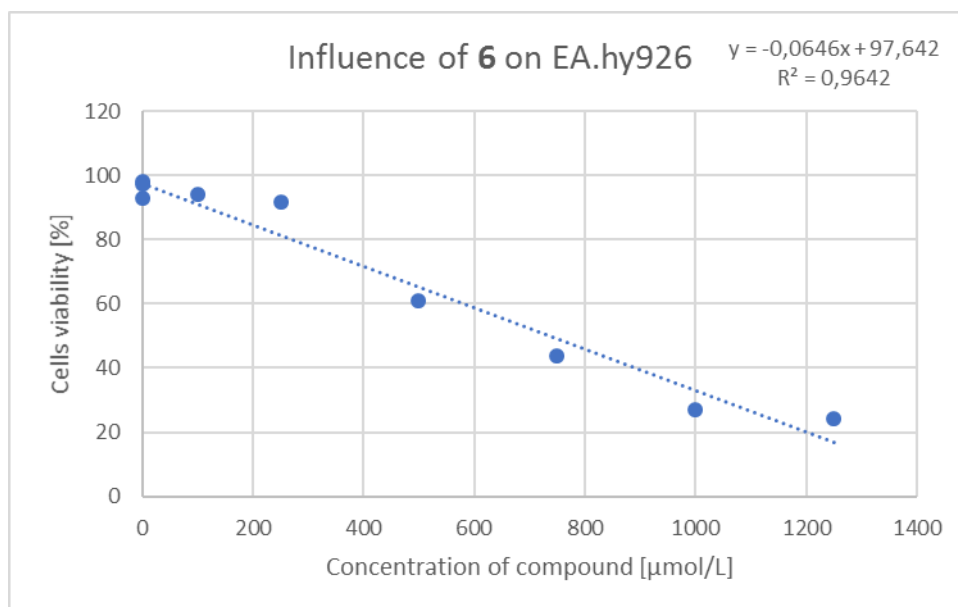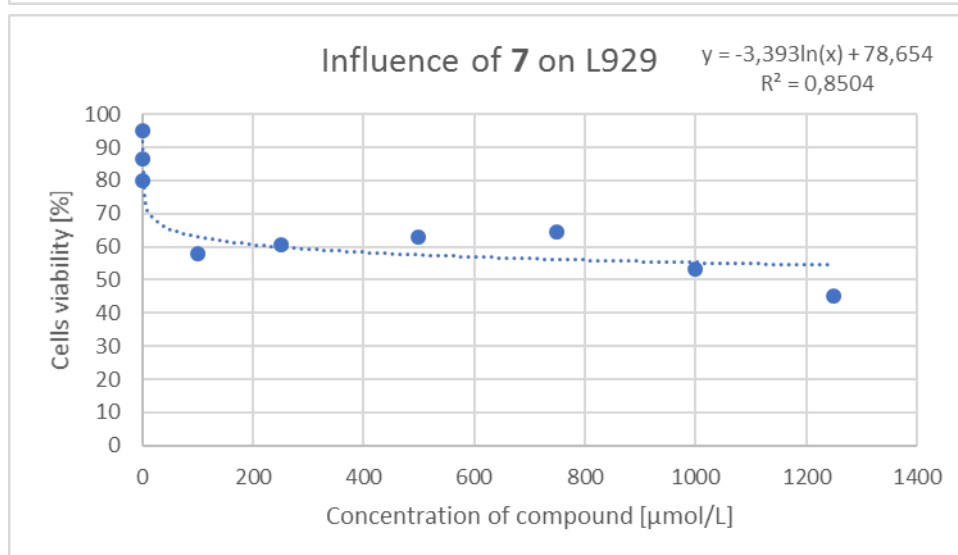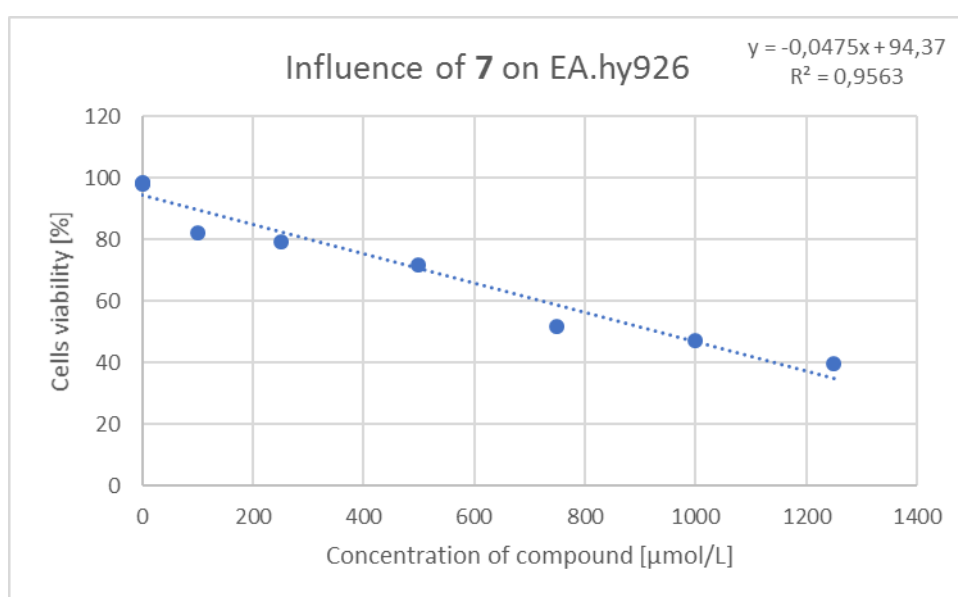

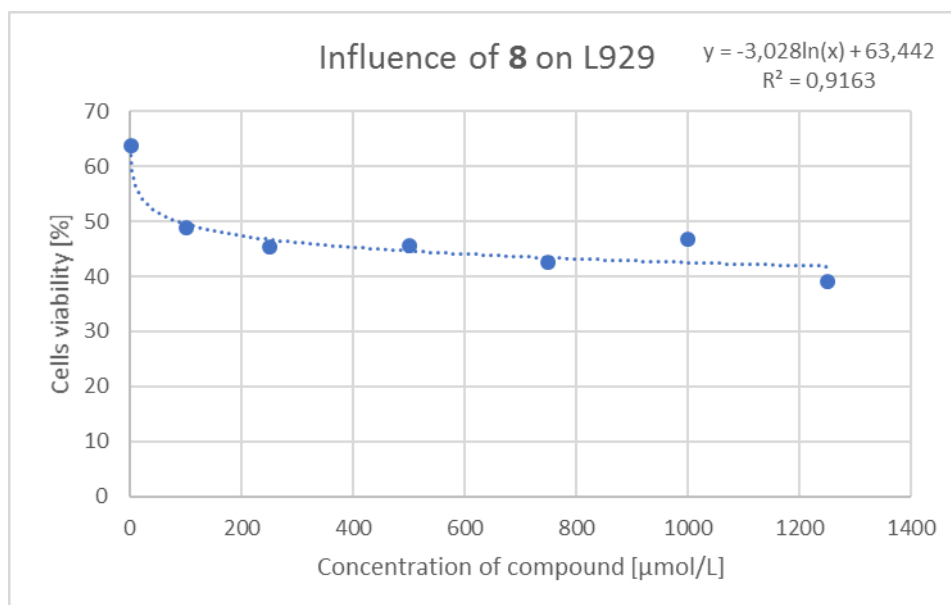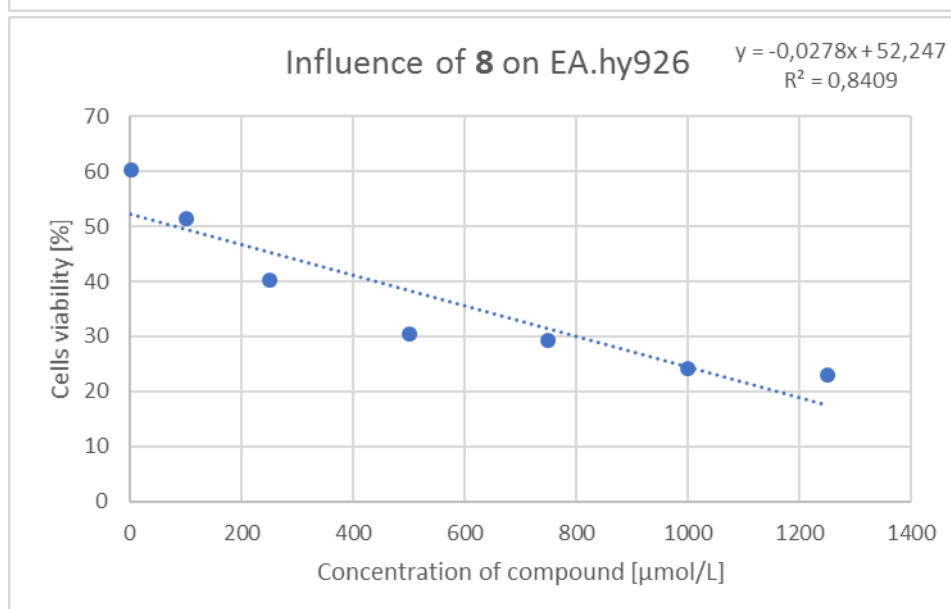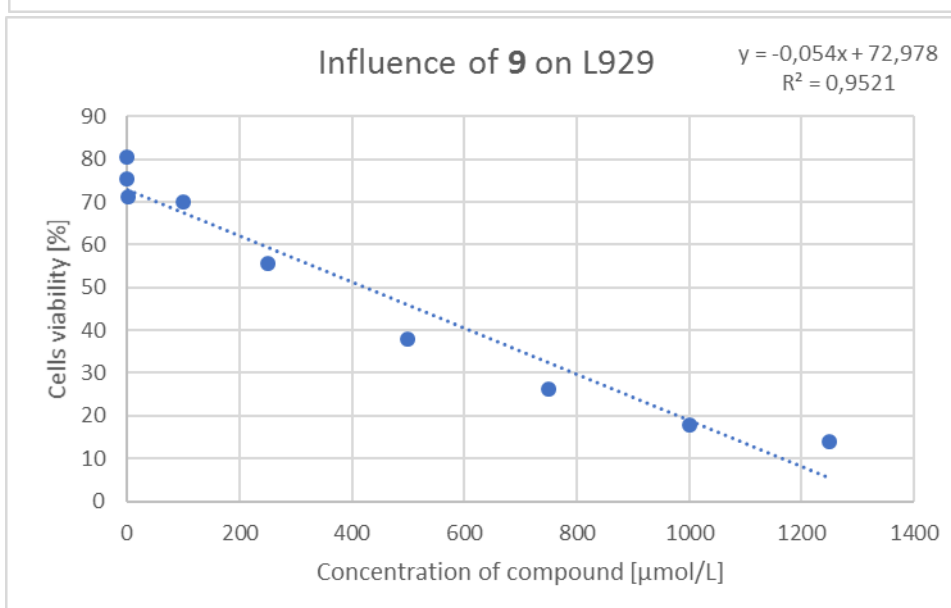



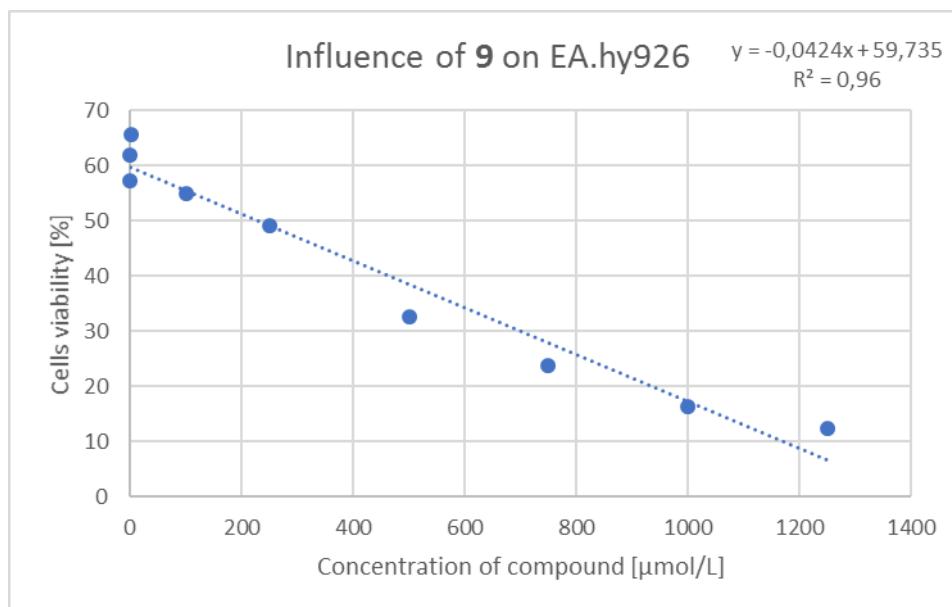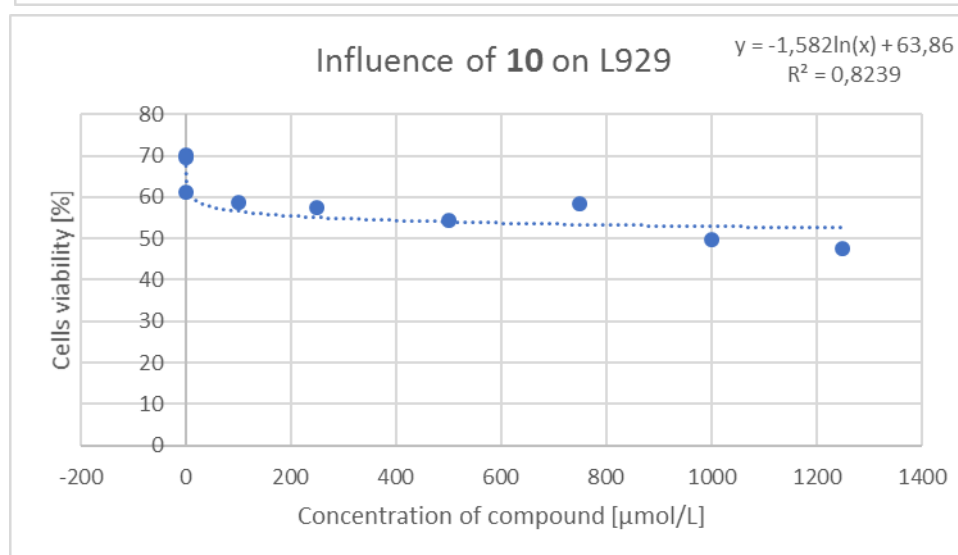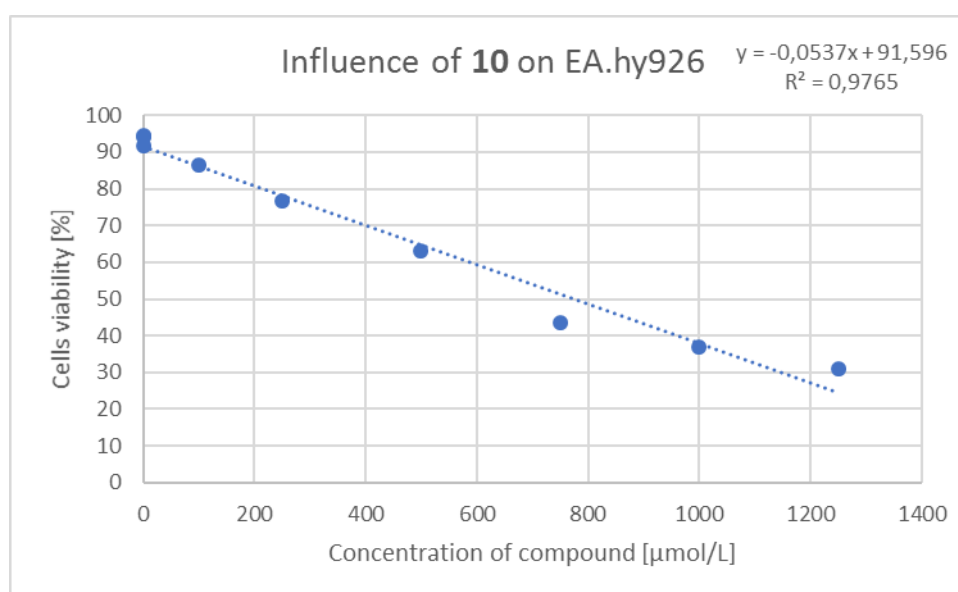

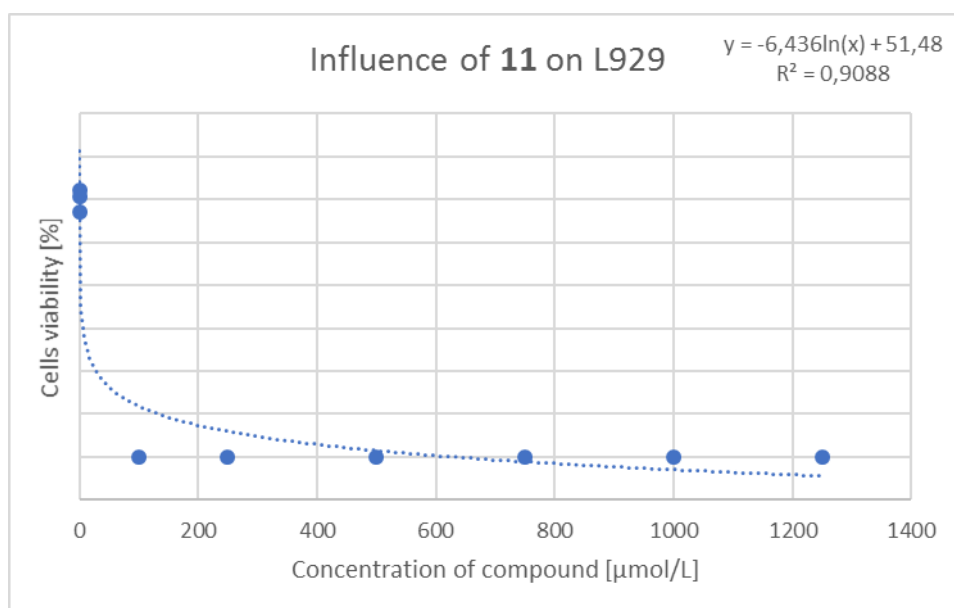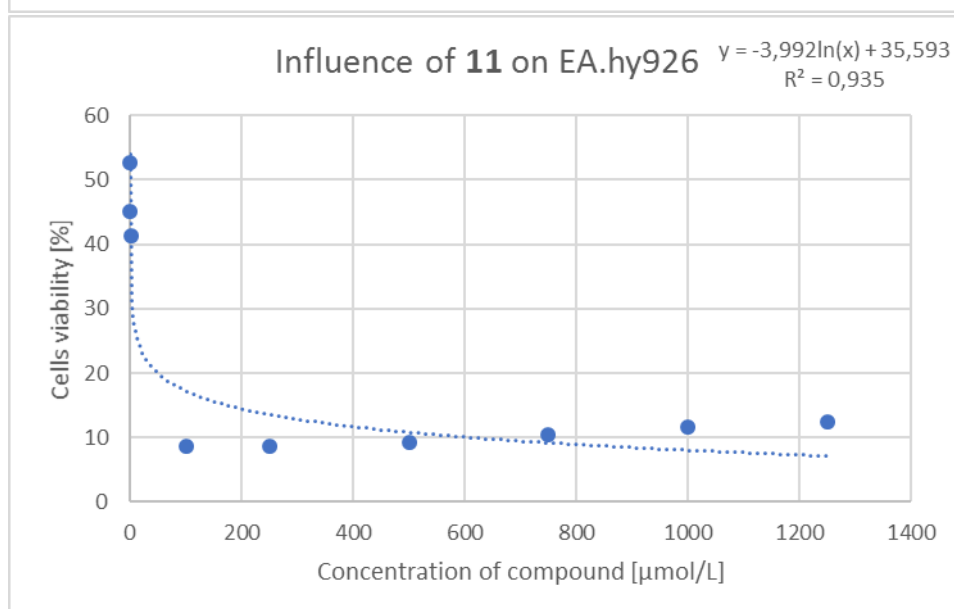

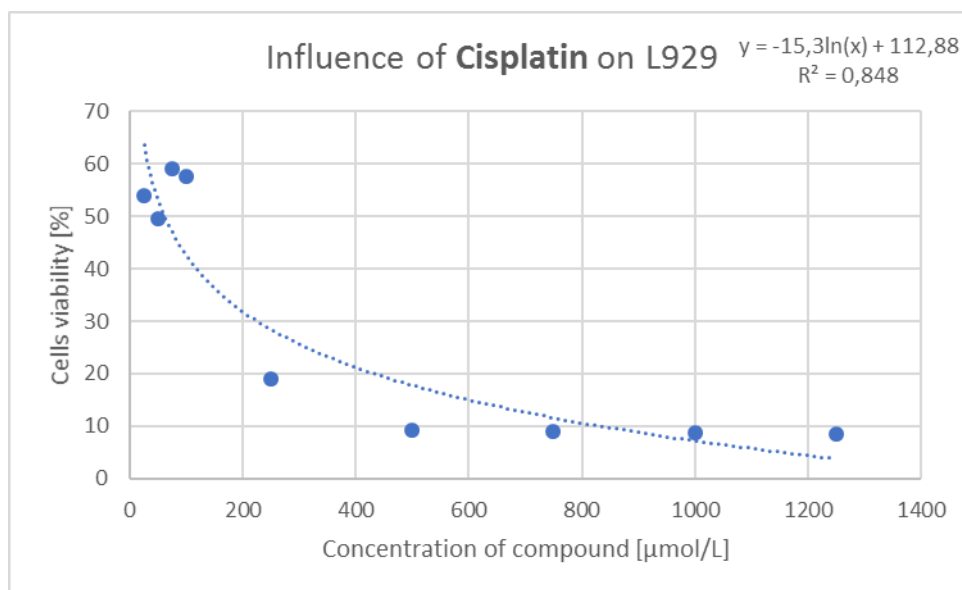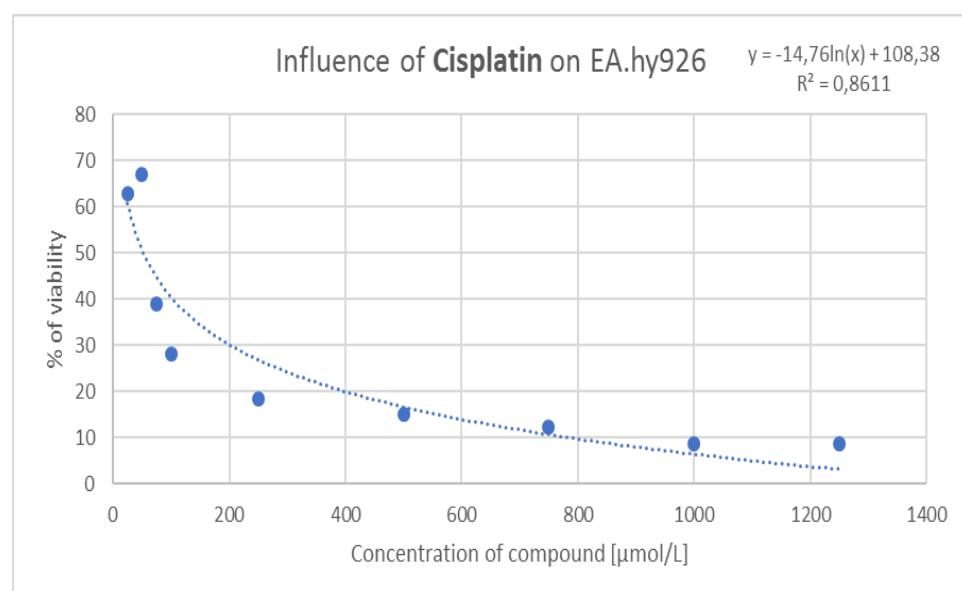

**Figure S4:**  $^1\text{H}$  NMR and  $^{13}\text{C}$  NMR Spectra $^1\text{H}$  NMR Spectra (DMSO- $d_6$ ), **1**: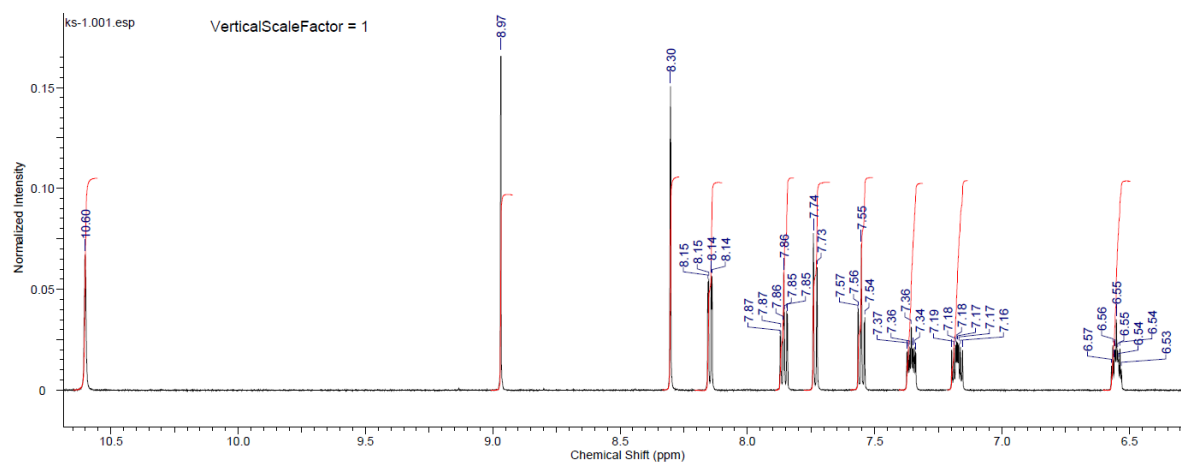 $^1\text{H}$  NMR Spectra (DMSO- $d_6$ ), **3**: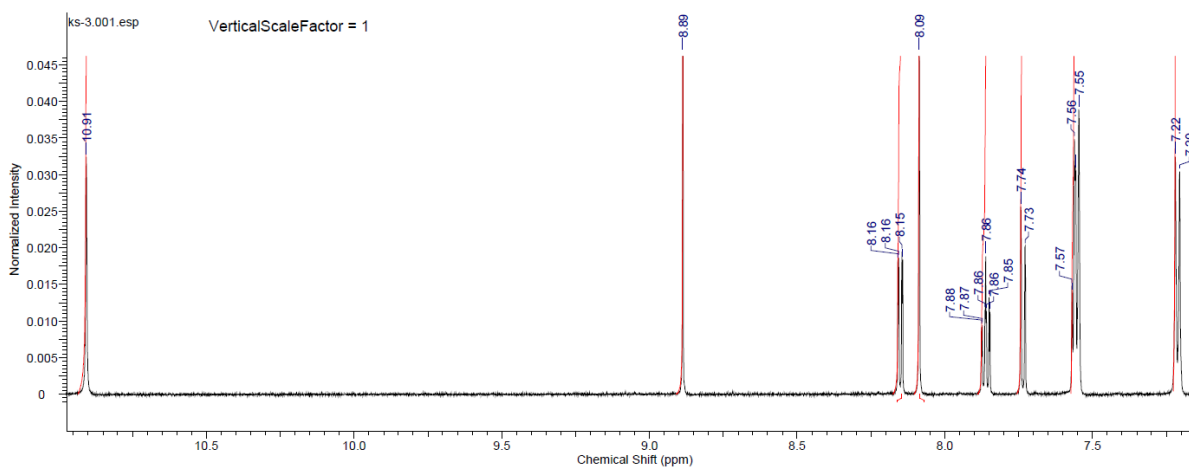 $^1\text{H}$  NMR Spectra (DMSO- $d_6$ ), **4**: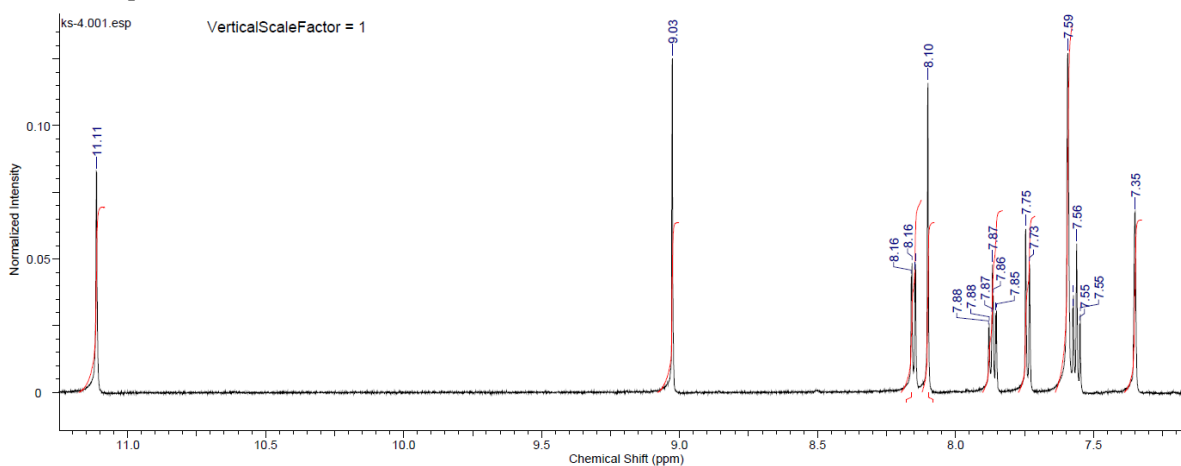

<sup>1</sup>H NMR Spectra (DMSO-d<sub>6</sub>), 5:

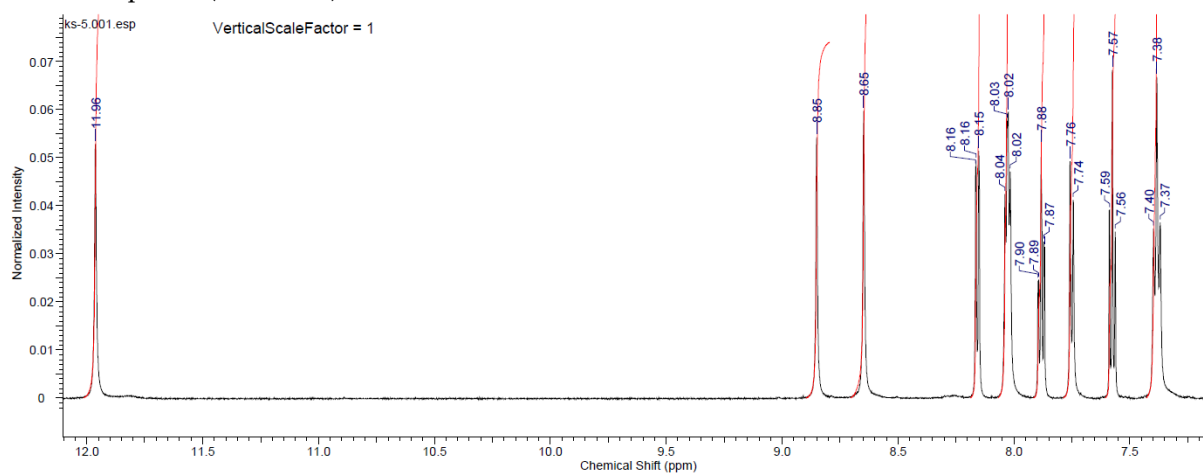

<sup>1</sup>H NMR Spectra (DMSO-d<sub>6</sub>), 6:

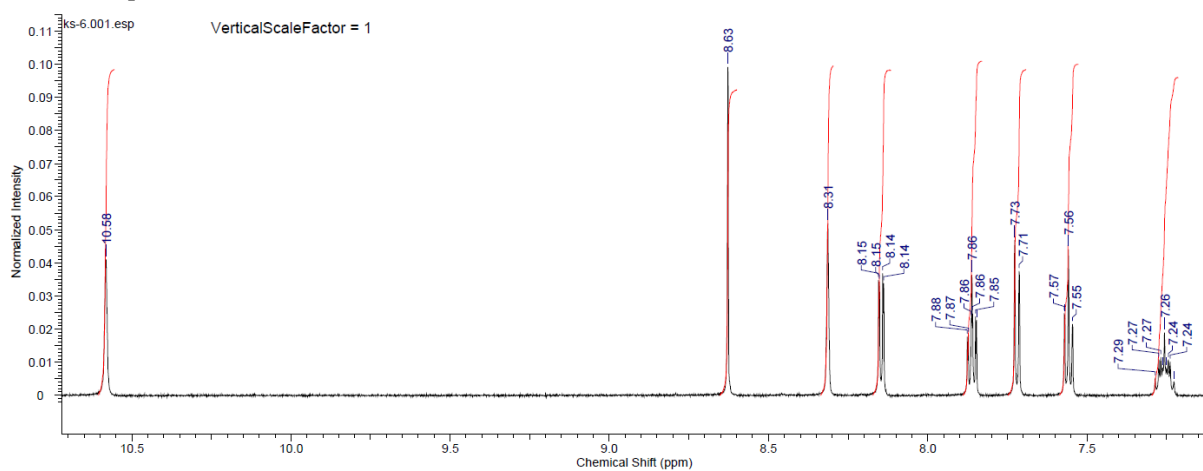

<sup>1</sup>H NMR Spectra (DMSO-d<sub>6</sub>), 7:

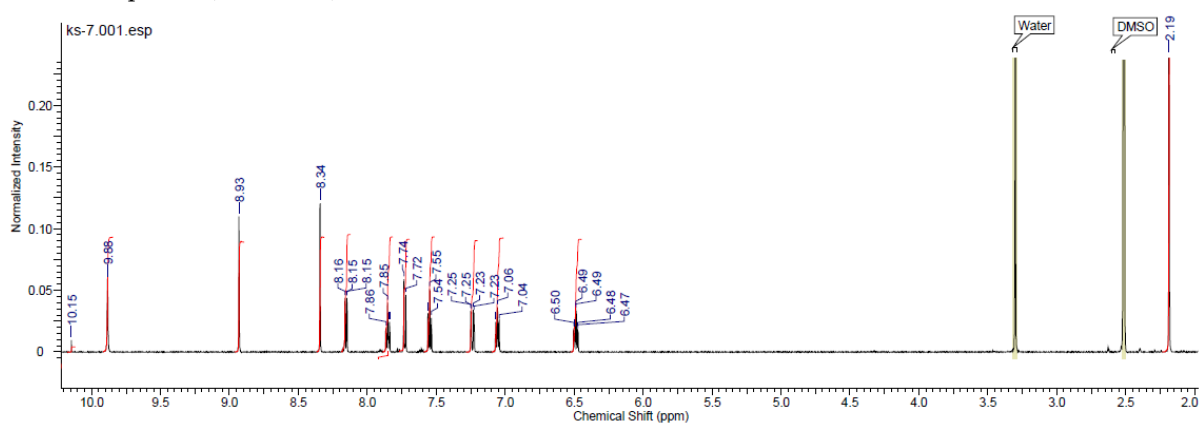

<sup>1</sup>H NMR Spectra (DMSO-d<sub>6</sub>), 8:

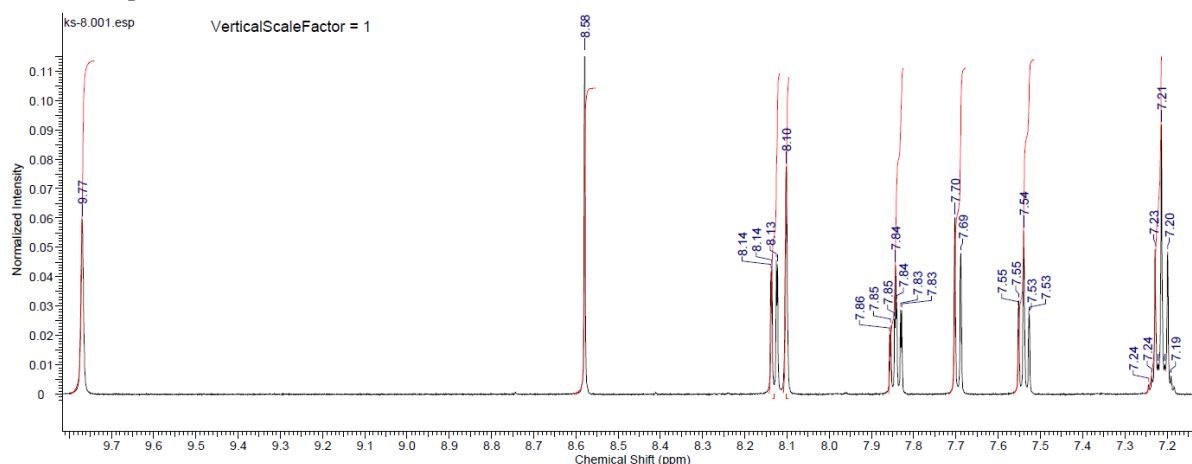

<sup>1</sup>H NMR Spectra (DMSO-d<sub>6</sub>), 9:

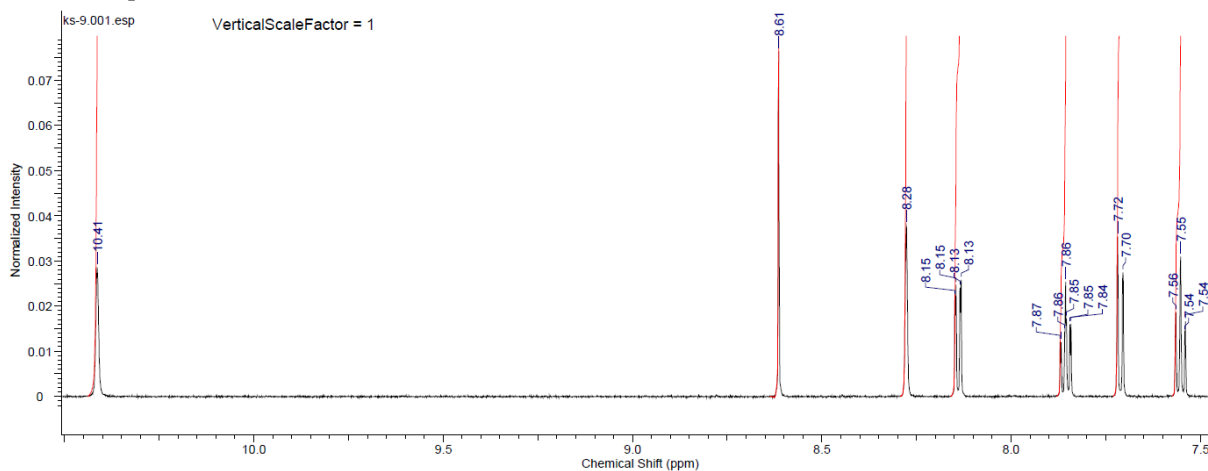

<sup>1</sup>H NMR Spectra (DMSO-d<sub>6</sub>), 10:

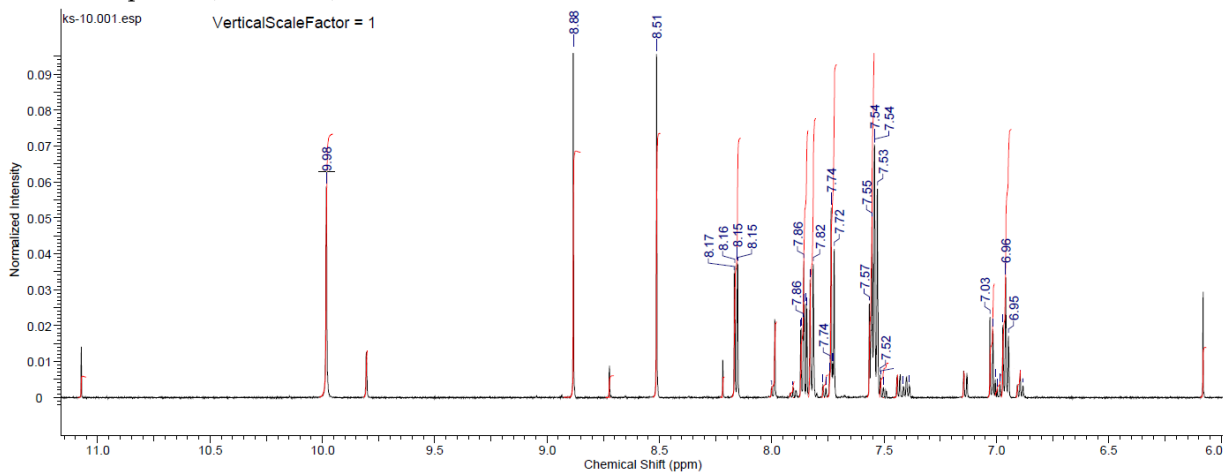

<sup>13</sup>C NMR Spectra (DMSO-d<sub>6</sub>), 1:

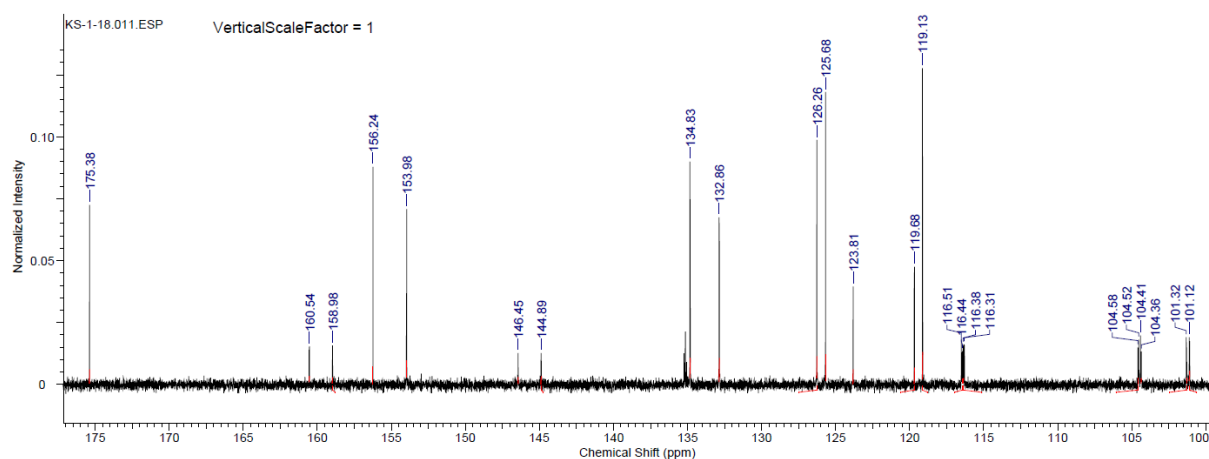

<sup>13</sup>C NMR Spectra (DMSO-d<sub>6</sub>), 3:

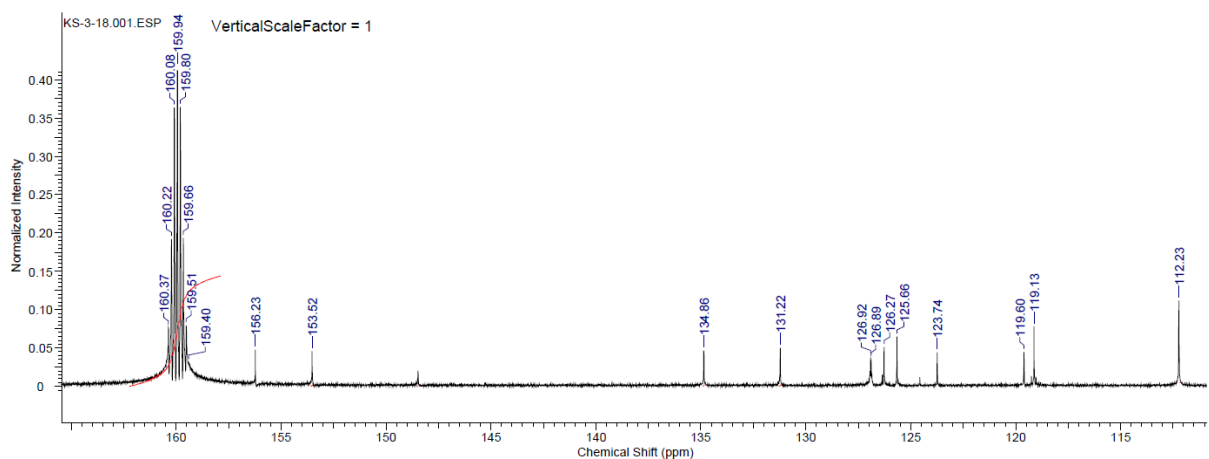

<sup>13</sup>C NMR Spectra (DMSO-d<sub>6</sub>), 3:

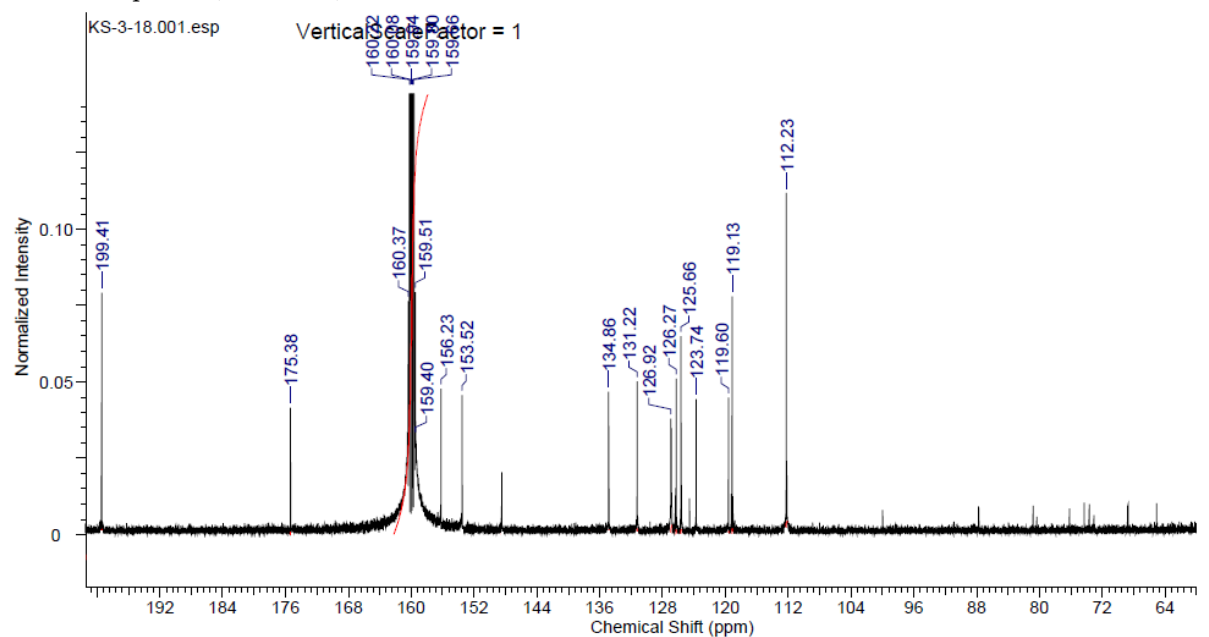

<sup>13</sup>C NMR Spectra (DMSO-d<sub>6</sub>), 5:

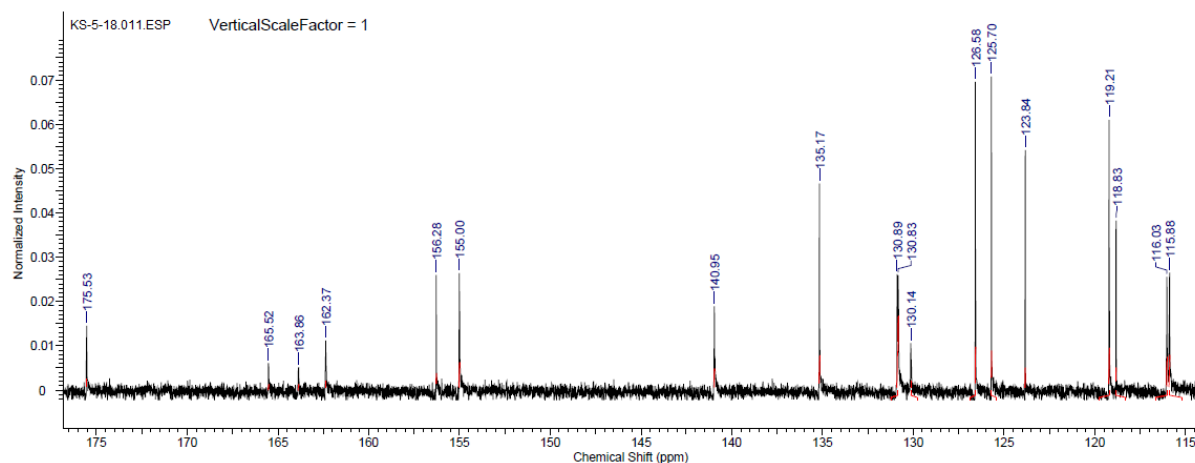

<sup>13</sup>C NMR Spectra (DMSO-d<sub>6</sub>), 6:

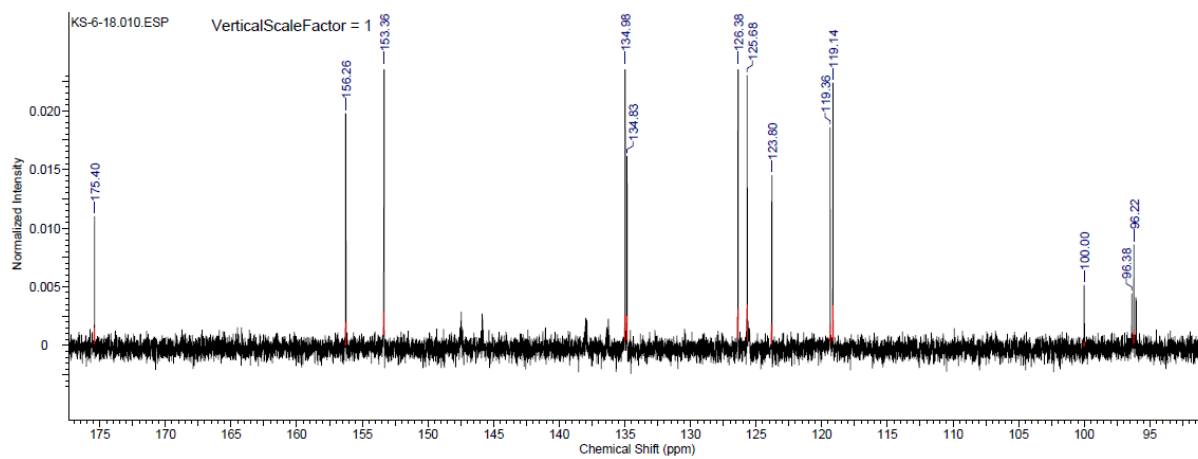

<sup>13</sup>C NMR Spectra (DMSO-d<sub>6</sub>), 7:

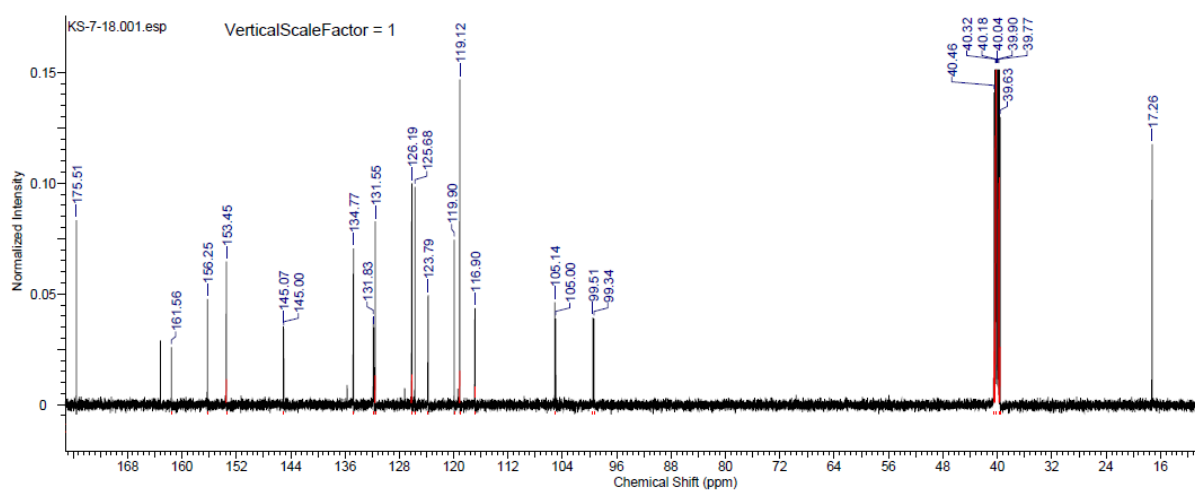



<sup>13</sup>C NMR Spectra (DMSO-d<sub>6</sub>), 8: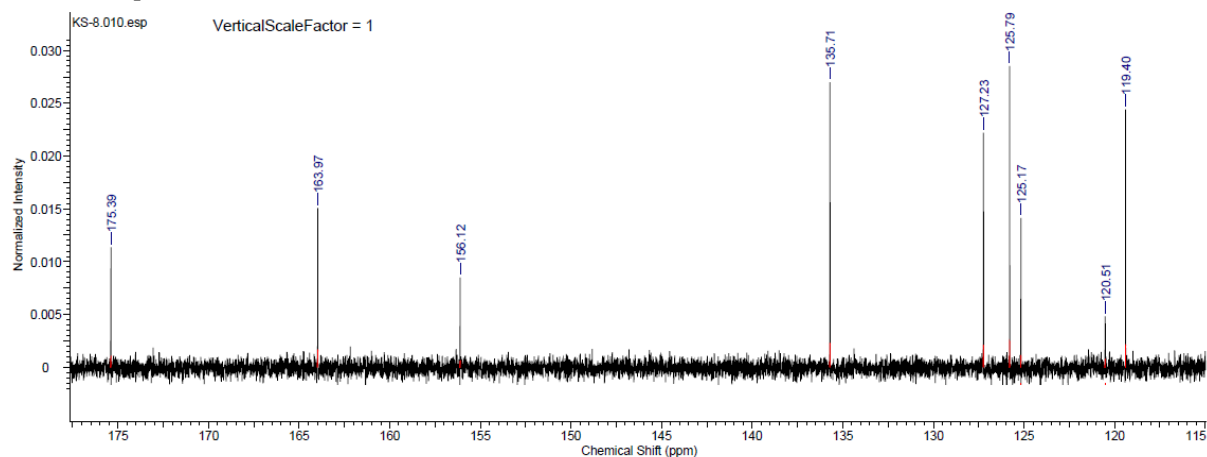<sup>13</sup>C NMR Spectra (DMSO-d<sub>6</sub>), 9: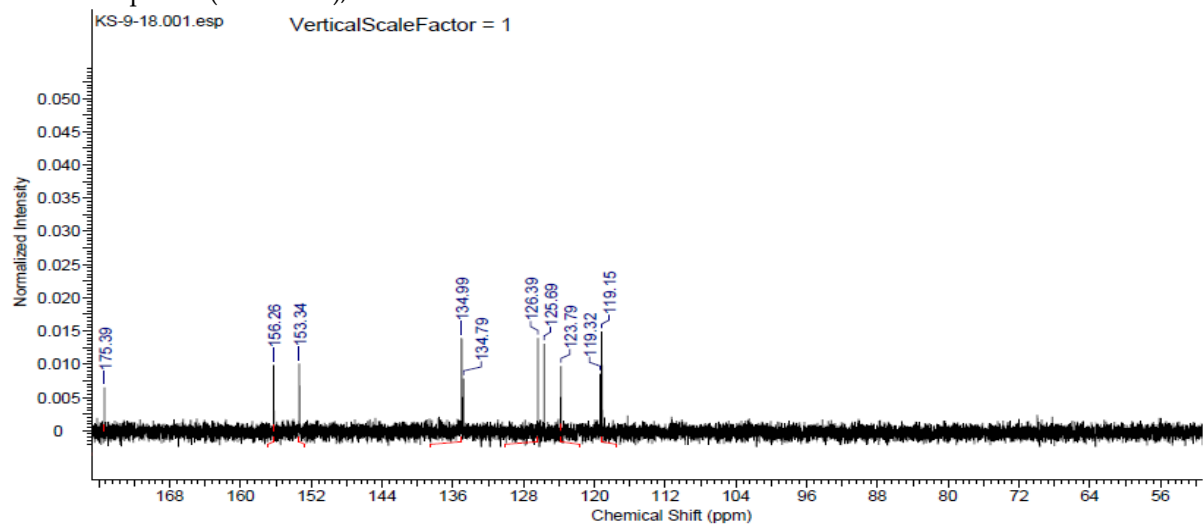<sup>13</sup>C NMR Spectra (DMSO-d<sub>6</sub>), 10: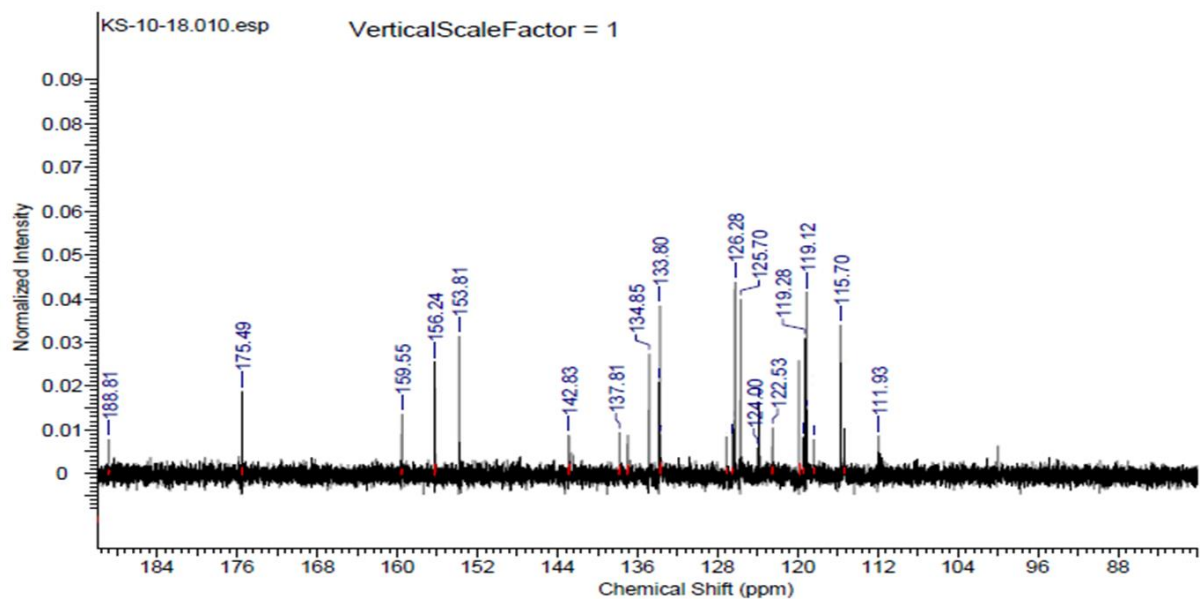

Supplement: s001 [file molecules-23-02067-s001.pdf]
